# Supplementary material for: A Video Intervention to Improve Patient Understanding of Tumor Genomic Testing in Patients with Cancer
Source: bioRxiv or medRxiv preprint supplement (doi:10.1101/2023.12.05.23299443), 2023-12-05

# Supplementary Figure 1.

**A**

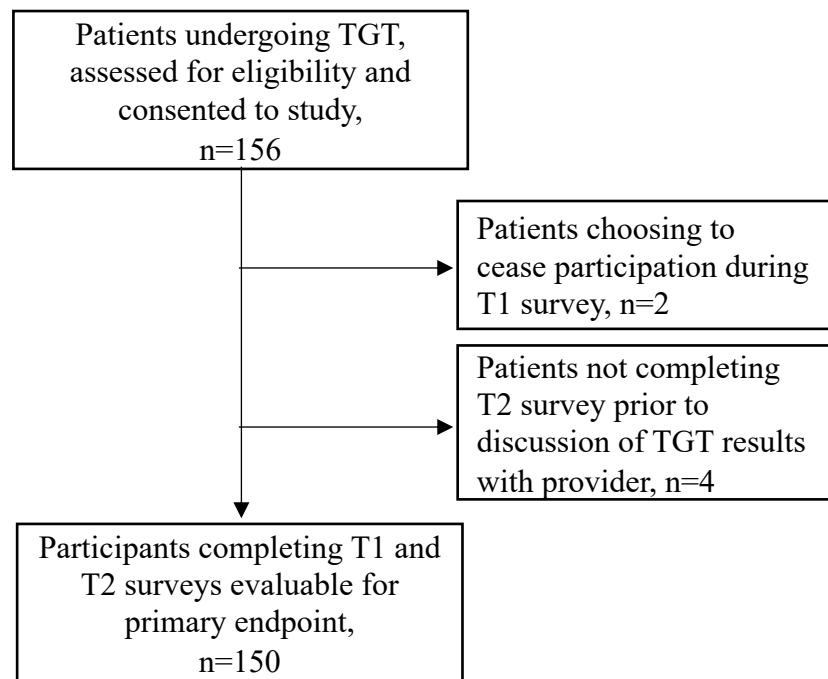

**B**

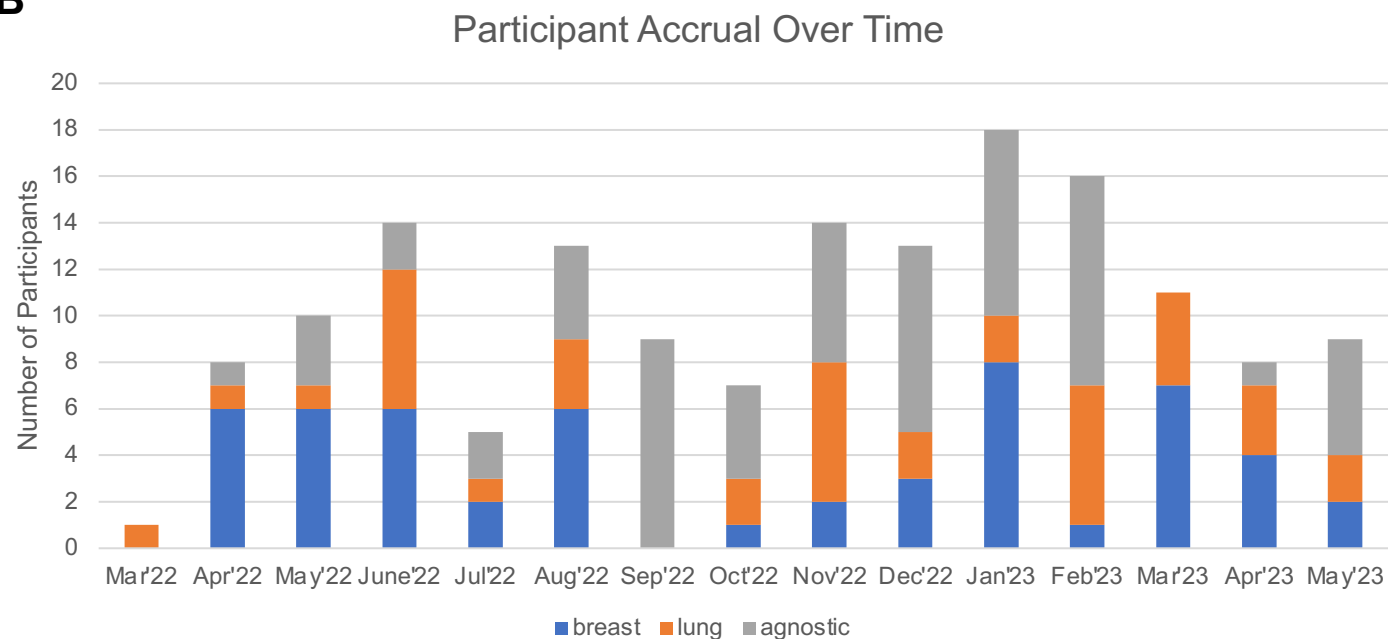

**C**

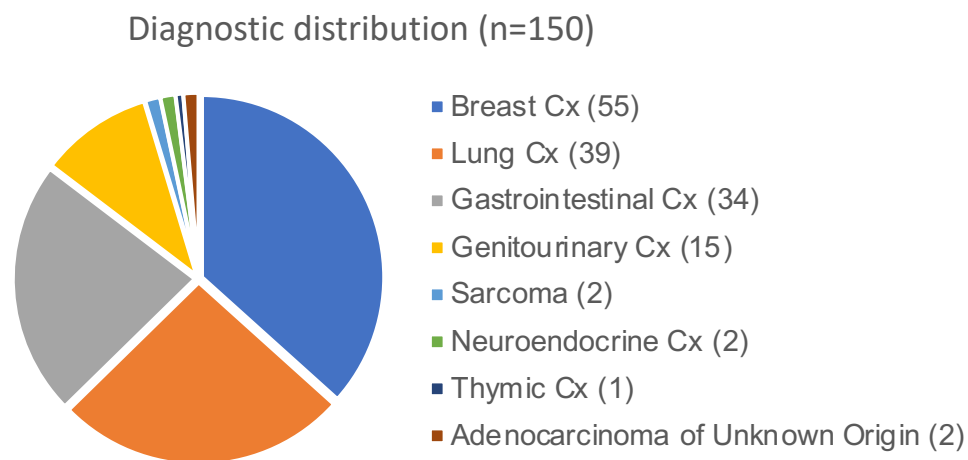

**D**

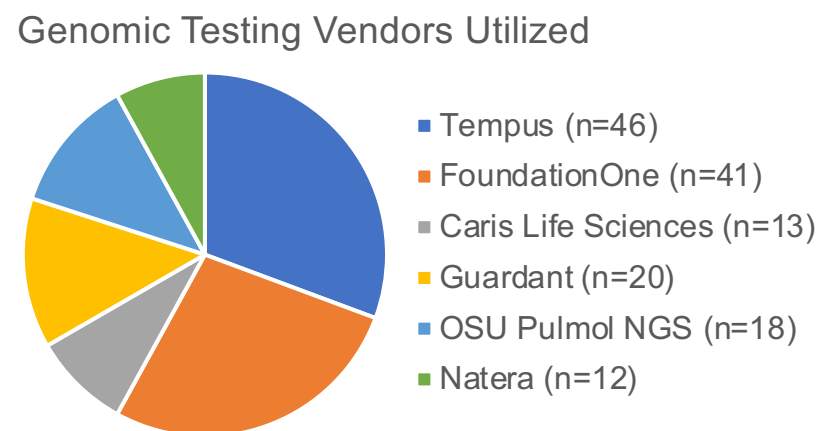

Supplement: Supplementary file [file media-1.pdf]
