# Supplementary material for: A Video Intervention to Improve Patient Understanding of Tumor Genomic Testing in Patients with Cancer
Source: bioRxiv or medRxiv preprint supplement (doi:10.1101/2023.12.05.23299443), 2023-12-05

# Supplementary Figure 3.

**A**

Participants' Self-Assessment of Knowledge and Need for Knowledge surrounding TGT

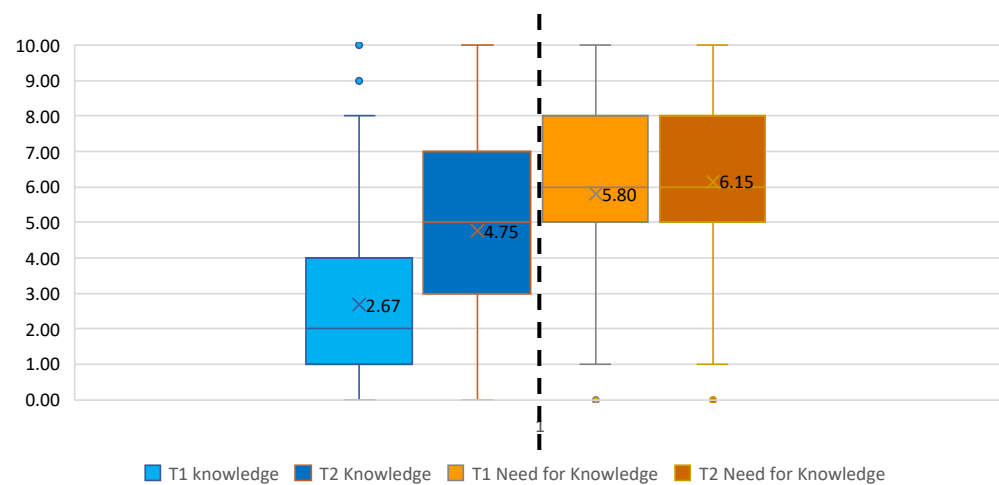

**B**

“My having tumor genomic testing would have...”

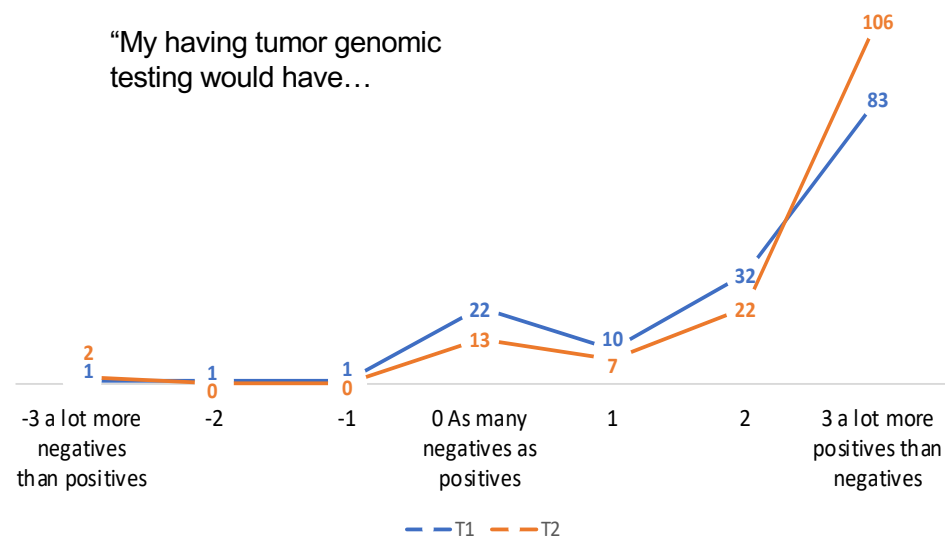

**C**

Participant Assessment of Video Quality

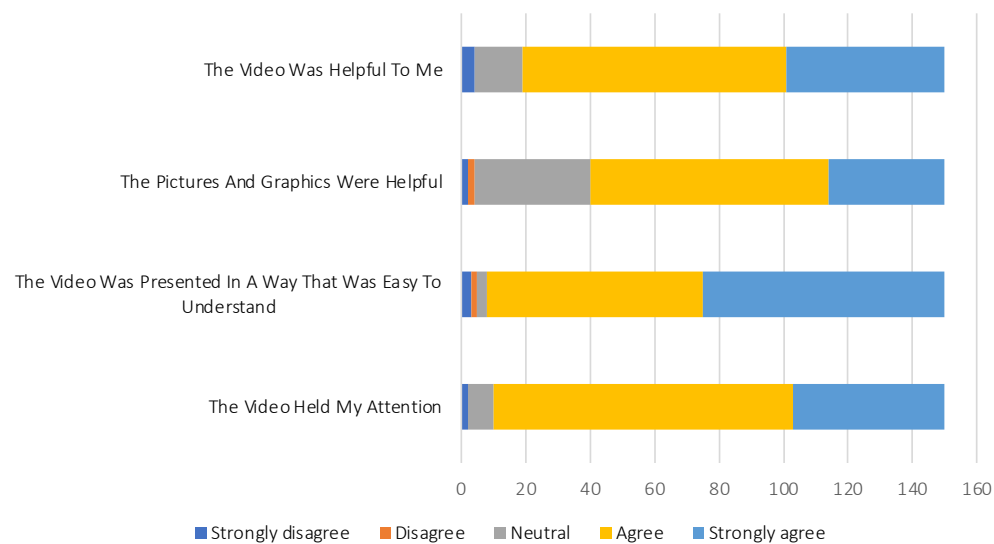

Supplement: Supplementary file [file media-3.pdf]
